# Supplementary material for: Global datasets of hourly carbon and water fluxes simulated using a satellite-based process model with dynamic parameterizations
Source: Copernicus journal article supplement (doi:10.5194/essd-2023-328), 2023-08-24
Supplement: Supplementary file 1 [file essd-2023-328-supplement.pdf]

*Supplementary of*

**Global datasets of hourly carbon and water fluxes simulated using  
a satellite-based process model with dynamic parameterizations**

Jiye Leng<sup>a</sup>, Jing M. Chen<sup>a,\*</sup>, Wenyu Li<sup>a</sup>, Xiangzhong Luo<sup>b</sup>, Mingzhu Xu<sup>c</sup>, Jane Liu<sup>a</sup>, Rong Wang<sup>c</sup>, Cheryl Rogers<sup>d</sup>, Bolun Li<sup>e</sup>, Yulin Yan<sup>c</sup>

<sup>a</sup> *Department of Geography and Planning, University of Toronto, Toronto, ON M5S 3G3, Canada.*

<sup>b</sup> *Department of Geography, National University of Singapore, 1 Arts Link, 117570 Singapore.*

<sup>c</sup> *School of Geographical Science, Fujian Normal University, Fuzhou, 350007, China*

<sup>d</sup> *School of Earth, Environment and Society, McMaster University, 1280 Main Street West, Hamilton, ON L8S 4K1, Canada.*

<sup>e</sup> *School of Geographical Sciences, Nanjing University of Information Science and Technology, Nanjing, 210044, China*

\*Corresponding author: [jing.chen@utoronto.ca](mailto:jing.chen@utoronto.ca) (J.M. Chen)

**1. List of the studied sites in the FLUXNET2015 datasets for site-level estimates of  $m$  and  $V_{cmax}^{25}$ .**

**Table A1.** Main characteristics and studied periods of flux sites in this study, obtained from <https://fluxnet.org/data/fluxnet2015-dataset/>

| Site Name | IGBP | Year                  | Lat      | Lon       |
|-----------|------|-----------------------|----------|-----------|
| BE-Lon    | CRO  | 2005-2014             | 50.5516  | 4.7461    |
| CH-Oe2    | CRO  | 2004-2014             | 47.2863  | 7.7343    |
| DE-Geb    | CRO  | 2002-2014             | 51.1001  | 10.9143   |
| DE-Kli    | CRO  | 2005-2014             | 50.8931  | 13.5224   |
| DE-Seh    | CRO  | 2008-2009             | 50.8706  | 6.4497    |
| FI-Jok    | CRO  | 2001                  | 60.8986  | 23.5135   |
| FR-Gri    | CRO  | 2006-2011             | 48.8442  | 1.9519    |
| IT-BCi    | CRO  | 2005-2007, 2013-2014  | 40.5238  | 14.9574   |
| IT-CA2    | CRO  | 2012-2014             | 42.3772  | 12.0260   |
| US-ARM    | CRO  | 2003--2012            | 36.6058  | -97.4888  |
| US-CRT    | CRO  | 2011-2014             | 41.6285  | -83.3471  |
| US-Tw3    | CRO  | 2014                  | 38.1159  | -121.6467 |
| IT-Noe    | SH   | 2004-2014             | 40.6062  | 8.1512    |
| US-KS2    | SH   | 2004-2006             | 28.6086  | -80.6715  |
| CA-TPD    | DBF  | 2012-2014             | 42.6353  | -80.5577  |
| DE-Hai    | DBF  | 2000-2011             | 51.0792  | 10.4530   |
| DE-Lnf    | DBF  | 2003-2006, 2010-2012  | 51.3282  | 10.3678   |
| DK-Sor    | DBF  | 2000, 2002-2014       | 55.4859  | 11.6446   |
| IT-CA3    | DBF  | 2012-2014             | 42.3800  | 12.0222   |
| IT-Col    | DBF  | 2005-2014             | 41.8494  | 13.5881   |
| IT-Isp    | DBF  | 2013-2014             | 45.8126  | 8.6336    |
| IT-PT1    | DBF  | 2003-2004             | 45.2009  | 9.0610    |
| IT-Ro1    | DBF  | 2001-2008             | 42.4081  | 11.9300   |
| IT-Ro2    | DBF  | 2002-2008, 2010, 2012 | 42.3903  | 11.9209   |
| JP-MBF    | DBF  | 2004-2005             | 44.3869  | 142.3186  |
| PA-SPn    | DBF  | 2008                  | 9.3181   | -79.6346  |
| US-MMS    | DBF  | 2000-2014             | 39.3232  | -86.4131  |
| US-Oho    | DBF  | 2004-2013             | 41.5545  | -83.8438  |
| US-UMB    | DBF  | 2002-2014             | 45.5598  | -84.7138  |
| US-UMd    | DBF  | 2008-2013             | 45.5625  | -84.6975  |
| US-WCr    | DBF  | 2000-2006, 2011-2014  | 45.8059  | -90.0799  |
| ZM-Mon    | DBF  | 2007-2008             | -15.4378 | 23.2528   |
| AU-Tum    | EBF  | 2002-2014             | -35.6566 | 148.1517  |
| AU-Wac    | EBF  | 2006-2008             | -37.4259 | 145.1878  |
| AU-Whr    | EBF  | 2012-2014             | -36.6732 | 145.0294  |

|        |     |                      |          |           |
|--------|-----|----------------------|----------|-----------|
| AU-Wom | EBF | 2011-2014            | -37.4222 | 144.0944  |
| BR-Sa3 | EBF | 2001-2003            | -3.0180  | -54.9714  |
| CN-Din | EBF | 2003-2005            | 23.1733  | 112.5361  |
| GF-Guy | EBF | 2004-2014            | 5.2788   | -52.9249  |
| GH-Ank | EBF | 2012, 2014           | 5.2685   | -2.6942   |
| IT-Cpz | EBF | 2001-2008            | 41.7053  | 12.3761   |
| MY-PSO | EBF | 2003-2009            | 2.9730   | 102.3062  |
| AU-ASM | ENF | 2011-2014            | -22.2830 | 133.2490  |
| CA-NS1 | ENF | 2003-2004            | 55.8792  | -98.4839  |
| CA-NS2 | ENF | 2003-2004            | 55.9058  | -98.5247  |
| CA-NS3 | ENF | 2003-2004            | 55.9117  | -98.3822  |
| CA-NS4 | ENF | 2003-2004            | 55.9144  | -98.3806  |
| CA-Qfo | ENF | 2004-2010            | 49.6925  | -74.3421  |
| CA-SF1 | ENF | 2004-2005            | 54.4850  | -105.8176 |
| CA-SF2 | ENF | 2002-2004            | 54.2539  | -105.8775 |
| CA-TP1 | ENF | 2003-2014            | 42.6609  | -80.5595  |
| CA-TP2 | ENF | 2003-2007            | 42.7744  | -80.4588  |
| CH-Dav | ENF | 2007-2012, 2014      | 46.8153  | 9.8559    |
| CN-Qia | ENF | 2003-2005            | 26.7414  | 115.0581  |
| CZ-BK1 | ENF | 2011-2013            | 49.5021  | 18.5369   |
| DE-Lkb | ENF | 2010-2013            | 49.0996  | 13.3047   |
| DE-Obe | ENF | 2010-2014            | 50.7867  | 13.7213   |
| DE-Tha | ENF | 2000-2014            | 50.9624  | 13.5652   |
| FI-Hyy | ENF | 2000-2002, 2004-2013 | 61.8474  | 24.2948   |
| FI-Sod | ENF | 2001-2006, 2011-2014 | 67.3624  | 26.6386   |
| FR-LBr | ENF | 2005-2008            | 44.7171  | -0.7693   |
| IT-Lav | ENF | 2005-2014            | 45.9562  | 11.2813   |
| IT-Ren | ENF | 2002-2003, 2005-2014 | 46.5869  | 11.4337   |
| IT-SR2 | ENF | 2014                 | 43.7320  | 10.2910   |
| IT-SRo | ENF | 2003-2012            | 43.7279  | 10.2844   |
| NL-Loo | ENF | 2000-2014            | 52.1666  | 5.7436    |
| RU-Fyo | ENF | 2007-2014            | 56.4615  | 32.9221   |
| US-Blo | ENF | 2000-2006            | 38.8953  | -120.6328 |
| US-GLE | ENF | 2005-2013            | 41.3665  | -106.2399 |
| US-Me2 | ENF | 2002-2014            | 44.4523  | -121.5574 |
| US-Me3 | ENF | 2004-2008            | 44.3154  | -121.6078 |
| US-Me5 | ENF | 2000-2002            | 44.4372  | -121.5668 |
| US-Me6 | ENF | 2011                 | 44.3233  | -121.6078 |
| US-NR1 | ENF | 2002-2014            | 40.0329  | -105.5464 |
| AT-Neu | GRA | 2003-2012            | 47.1167  | 11.3175   |
| AU-DaP | GRA | 2008-2012            | -14.0633 | 131.3181  |
| AU-Emr | GRA | 2012-2013            | -23.8587 | 148.4746  |
| AU-Rig | GRA | 2011-2014            | -36.6499 | 145.5759  |
| AU-Stp | GRA | 2009-2014            | -17.1507 | 133.3502  |

|        |     |                      |          |           |
|--------|-----|----------------------|----------|-----------|
| AU-Ync | GRA | 2013-2014            | -34.9893 | 146.2907  |
| CH-Cha | GRA | 2006-2014            | 47.2102  | 8.4104    |
| CH-Fru | GRA | 2006-2014            | 47.1158  | 8.5378    |
| CH-Oe1 | GRA | 2003-2007            | 47.2858  | 7.7319    |
| CN-Cng | GRA | 2008-2009            | 44.5934  | 123.5092  |
| CN-Dan | GRA | 2004-2005            | 30.4978  | 91.0664   |
| CN-HaM | GRA | 2002-2004            | 37.3700  | 101.1800  |
| CN-Sw2 | GRA | 2011                 | 41.7902  | 111.8971  |
| CZ-BK2 | GRA | 2007-2012            | 49.4944  | 18.5429   |
| DE-Gri | GRA | 2007-2014            | 50.9500  | 13.5126   |
| DK-Eng | GRA | 2006-2007            | 55.6905  | 12.1918   |
| DK-ZaH | GRA | 2001-2004            | 74.4733  | -20.5503  |
| IT-MBo | GRA | 2005-2013            | 46.0147  | 11.0458   |
| IT-Tor | GRA | 2009-2014            | 45.8444  | 7.5781    |
| NL-Hor | GRA | 2007-2010            | 52.2404  | 5.0713    |
| PA-SPs | GRA | 2008-2009            | 9.3138   | -79.6314  |
| RU-Tks | GRA | 2011-2013            | 71.5943  | 128.8878  |
| US-AR1 | GRA | 2010-2012            | 36.4267  | -99.4200  |
| US-AR2 | GRA | 2010-2011            | 36.6358  | -99.5975  |
| US-Goo | GRA | 2003-2006            | 34.2547  | -89.8735  |
| US-IB2 | GRA | 2005-2011            | 41.8406  | -88.2410  |
| US-SRG | GRA | 2009-2014            | 31.7894  | -110.8277 |
| US-Var | GRA | 2001-2014            | 38.4133  | -120.9507 |
| US-Wkg | GRA | 2005-2014            | 31.7365  | -109.9419 |
| AR-SLu | MF  | 2010                 | -33.4648 | -66.4598  |
| BE-Vie | MF  | 2000-2014            | 50.3050  | 5.9981    |
| CH-Lae | MF  | 2005-2014            | 47.4781  | 8.3650    |
| CN-Cha | MF  | 2003-2005            | 42.4025  | 128.0958  |
| JP-SMF | MF  | 2003-2006            | 35.2617  | 137.0788  |
| US-PFa | MF  | 2000-2014            | 45.9459  | -90.2723  |
| US-Syv | MF  | 2002-2007, 2012-2014 | 46.2420  | -89.3477  |
| AU-TTE | SH  | 2013-2014            | -22.2870 | 133.6400  |
| CA-NS6 | SH  | 2003-2004            | 55.9167  | -98.9644  |
| CA-NS7 | SH  | 2003-2004            | 56.6358  | -99.9483  |
| CA-SF3 | SH  | 2002-2005            | 54.0916  | -106.0053 |
| ES-Amo | SH  | 2008-2012            | 36.8336  | -2.2523   |
| ES-LgS | SH  | 2007                 | 37.0979  | -2.9658   |
| ES-LJu | SH  | 2005-2013            | 36.9266  | -2.7521   |
| US-SRC | SH  | 2009-2013            | 31.9083  | -110.8395 |
| US-Sta | SH  | 2008                 | 41.3966  | -106.8024 |
| US-Whs | SH  | 2008-2014            | 31.7438  | -110.0522 |
| AU-Cpr | SAV | 2013-2014            | -34.0021 | 140.5891  |
| AU-DaS | SAV | 2008-2014            | -14.1593 | 131.3881  |
| AU-Dry | SAV | 2009-2014            | -15.2588 | 132.3706  |

|        |     |           |          |           |
|--------|-----|-----------|----------|-----------|
| AU-GWW | SAV | 2013-2014 | -30.1913 | 120.6541  |
| SD-Dem | SAV | 2007-2009 | 13.2829  | 30.4783   |
| SN-Dhr | SAV | 2011-2013 | 15.4028  | -15.4322  |
| ZA-Kru | SAV | 2001-2012 | -25.0197 | 31.4969   |
| AU-Fog | WET | 2007      | -12.5452 | 131.3072  |
| CN-Ha2 | WET | 2003-2005 | 37.6086  | 101.3269  |
| FI-Lom | WET | 2008-2009 | 67.9972  | 24.2092   |
| AU-Ade | WSA | 2008      | -13.0769 | 131.1178  |
| AU-Gin | WSA | 2012-2014 | -31.3764 | 115.7138  |
| AU-How | WSA | 2004-2014 | -12.4943 | 131.1523  |
| AU-RDF | WSA | 2012      | -14.5636 | 132.4776  |
| US-SRM | WSA | 2004-2014 | 31.8214  | -110.8661 |
| US-Ton | WSA | 2002-2014 | 38.4316  | -120.9660 |

## 2. Description of key modules in BEPS

### 2.1 Leaf-level photosynthesis and transpiration

BEPS adopts the Farquhar model (Farquhar et al., 1980) to calculate the leaf-level photosynthetic rate, expressed as:

$$A = \min(W_c, W_j) - R_d \quad (1.)$$

where  $W_c$  is the photosynthetic rate ( $\mu\text{mol m}^{-2} \text{s}^{-1}$ ) under RuBP carboxylase/oxygenase limited conditions,  $W_j$  is the photosynthetic rate under electron transport limited conditions in the RuBP regeneration process, and  $R_d$  is the dark respiration rate.  $W_c$ ,  $W_j$ , and  $R_d$  are calculated as:

$$W_c = V_{cmax} \frac{C_i - \Gamma}{C_i + K} \quad (2.)$$

$$W_j = J \frac{C_i - \Gamma}{4C_i + 8K} \quad (3.)$$

$$R_d = 0.015V_{cmax} \quad (4.)$$

where  $V_{cmax}$  is the maximum carboxylation rate ( $\mu\text{mol m}^{-2} \text{s}^{-1}$ ) calculated from preset  $V_{cmax}^{25}$  and a temperature dependent function (Sharkey et al., 2007),  $J$  is the electron transport rate ( $\mu\text{mol m}^{-2} \text{s}^{-1}$ ),  $C_i$  is the intercellular  $\text{CO}_2$  concentration ( $\mu\text{mol mol}^{-1}$ ),  $\Gamma$  is the  $\text{CO}_2$  compensation point without dark respiration ( $\mu\text{mol mol}^{-1}$ ), and  $K$  is a Rubisco enzyme kinetics function as  $K = K_c / (1 + O_i / K_o)$ .  $K_c$ ,  $K_o$  are Michaelis-Menten constants for  $\text{CO}_2$  ( $\mu\text{mol mol}^{-1}$ ) and  $\text{O}_2$  ( $\text{mmol mol}^{-1}$ ), and  $O_i$  is the intercellular oxygen concentration ( $\text{mmol}$

mol<sup>-1</sup>).  $J$  is a function of PPFD ( $\mu\text{mol m}^{-2} \text{s}^{-1}$ ) and the maximum electron transport rate ( $J_{max}$ ), expressed as:

$$J = J_{max} \times \frac{PPFD}{PPFD + 2.1J_{max}} \quad (5.)$$

and  $J_{max}$  is obtained using the equation by Medlyn et al. (1999):

$$J_{max} = 2.39V_{cmax} - 14.2 \quad (6.)$$

BEPS solves the  $A$  and  $g_s$  using the cubic analytical method (Baldocchi, 1994) by coupling the Farquhar model and the Ball-Woodrow-Berry model (Ball et al., 1987), which is expressed as:

$$g_s = m \cdot A \frac{RH}{C_a} + g_0 \quad (7.)$$

where  $A$  is the photosynthetic rate ( $\text{mol m}^{-2} \text{s}^{-1}$ ),  $RH$  is the relative humidity at the leaf surface (%),  $C_a$  is the CO<sub>2</sub> concentration at the leaf surface ( $\mu\text{mol mol}^{-1}$ ),  $m$  is the slope of linear regression between  $g_s$  and  $A \cdot RH/C_a$  (unitless), and  $g_0$  is the intercept of the regression representing minimum  $g_s$ . The leaf-level transpiration is then calculated by applying the Penman-Monteith equation:

$$T = \frac{\Delta(R_n - G) + \rho c_p VPD g_b}{\lambda \left( \Delta + \left( 1 + \frac{g_b}{g_s} \right) \gamma \right)} \quad (8.)$$

where  $R_n$  is the net radiation on the leaf surface ( $\text{W m}^{-2}$ ),  $G$  is the heat storage of the leaf,  $\rho$  is the density of air ( $\text{kg m}^{-3}$ ),  $c_p$  is the specific heat of air ( $\text{J kg}^{-1} \text{ }^\circ\text{C}^{-1}$ ),  $VPD$  is the vapor pressure deficit on the leaf surface (kPa),  $\Delta$  is the rate of change of saturation specific humidity with air temperature ( $\text{kPa }^\circ\text{C}^{-1}$ ),  $\lambda$  is the latent heat of water ( $\text{J kg}^{-1}$ ),  $\gamma$  is the psychrometric constant ( $\text{kPa }^\circ\text{C}^{-1}$ ), and  $g_b$  is the leaf boundary layer resistance to water vapor ( $\text{m s}^{-1}$ ).

## 2.2 Two-level scheme upscaling carbon and water fluxes from leaf to canopy

The canopy can be separated into sunlit and shaded leaf groups based on the first order of the incoming solar radiation on leaves (Chen et al., 1997; Norman, 1982). Sunlit leaves receive both direct and diffuse radiation and shaded leaves only receive diffuse solar radiation. Sunlit and shaded LAI ( $LAI_{sunlit}$  and  $LAI_{shaded}$ ) are calculated in BEPS following the method described in Chen et al. (1999):

$$LAI_{sunlit} = 2\cos\theta \left( 1 - e^{-\frac{0.5\Omega LAI_{total}}{\cos\theta}} \right) \quad (9.)$$

$$LAI_{shaded} = LAI_{total} - LAI_{sunlit} \quad (10.)$$

where  $\theta$  is the solar zenith angle,  $LAI_{total}$  is the total leaf area index of the canopy, and  $\Omega$  is the clumping index. The leaf-level  $A$  and  $T$  are then upscaled to the canopy level ( $GPP$ ,  $T_{total}$ ):

$$GPP = A_{sunlit} \times LAI_{sunlit} + A_{shaded} \times LAI_{shaded} \quad (11.)$$

$$T_{total} = T_{sunlit} \times LAI_{sunlit} + T_{shaded} \times LAI_{shaded} \quad (12.)$$

where  $A_{sunlit}$  and  $T_{sunlit}$  are the instantaneous photosynthetic rate and the transpiration from a sunlit leaf,  $A_{shaded}$  and  $T_{shaded}$  are the instantaneous photosynthetic rate and the transpiration from a shaded leaf. BEPS also simulates evaporation from soil ( $E_{soil}$ ) and from wet leaf surface ( $E_{leaf}$ ):

$$ET = T_{total} + E_{soil} + E_{leaf} \quad (13.)$$

but these two processes,  $E_{soil}$  and  $E_{leaf}$ , are not regulated by stomatal functions and leaf photosynthesis, thus not likely to change much in  $m$  and  $V_{cmax}$  optimizations.

### 3. The parameter optimization algorithm to estimate $m$ and $V_{cmax}^{25}$ in BEPS

The Bayesian parameter optimization has been tested with good accuracy and high efficiency for  $m$  and  $V_{cmax25}$  retrievals in Leng et al. (2023, under review). With optimized seasonally varied  $m$  and  $V_{cmax}^{25}$ , the estimates of carbon and water fluxes can be significantly improved. In this study, the carbon-water-coupling cost function was adopted to derive  $m$  and  $V_{cmax}^{25}$  at site for each month, which is expressed as:

$$f_{cost} = |1 - a_{GPP_{obs}}^{GPP_{mod}}| \times \frac{1}{N} \sum \left( \frac{GPP_{mod} - GPP_{obs}}{GPP_{obs}} \right)^2 + |1 - a_{ET_{obs}}^{ET_{mod}}| \times \frac{1}{N} \sum \left( \frac{ET_{mod} - ET_{obs}}{ET_{obs}} \right)^2 \quad (14.)$$

where  $GPP_{obs}$  is the observed GPP from fluxes,  $GPP_{mod}$  is the modeled GPP from BEPS,  $ET_{obs}$  is the observed ET from fluxes,  $ET_{mod}$  is the modeled ET from BEPS,  $N$  is the total number of hourly simulations in a parameter optimization interval,  $a_{GPP_{obs}}^{GPP_{mod}}$  is the ordinal

least square regression (OLS) slope between  $GPP_{mod}$  and  $GPP_{obs}$ ,  $a_{ET_{obs}}^{ET_{mod}}$  is the OLS slope between  $ET_{mod}$  and  $ET_{obs}$ .

At site level,  $m$  and  $V_{cmax25}$  were estimated monthly by minimizing the cost function, in which  $m$  was set in range  $[0, 25]$  and  $V_{cmax25}$  was set in range  $[10, 200]$  according to the reported ranges in literature, and the optimized  $m$  and  $V_{cmax25}$  were filtered based on the normal ranges reported in literature, respectively. (Chen et al., 2022; Miner et al., 2017; Smith et al., 2019; Wolz et al., 2017). BEPS was run for 500 times for  $m$  and  $V_{cmax25}$  of each month at each site to get the global optima in the Bayesian parameter optimization.



## References

- Baldocchi, D. (1994). An analytical solution for coupled leaf photosynthesis and stomatal conductance models. *Tree Physiology*, *14*, 1069-1079
- Ball, J.T., Woodrow, I.E., & Berry, J.A. (1987). A Model Predicting Stomatal Conductance and its Contribution to the Control of Photosynthesis under Different Environmental Conditions. In J. Biggins (Ed.), *Progress in Photosynthesis Research: Volume 4 Proceedings of the VIIth International Congress on Photosynthesis Providence, Rhode Island, USA, August 10–15, 1986* (pp. 221-224). Dordrecht: Springer Netherlands
- Chen, J., Wang, R., Liu, Y., He, L., Croft, H., Luo, X., Wang, H., Smith, N., Keenan, T., Prentice, I., Zhang, Y., Ju, W., & Dong, N. (2022). Global datasets of leaf photosynthetic capacity for ecological and earth system research. *Earth System Science Data*, *14*, 4077-4093
- Chen, J.M., Liu, J., Cihlar, J., & Goulden, M.L. (1999). Daily canopy photosynthesis model through temporal and spatial scaling for remote sensing applications. *Ecological Modelling*, *124*, 99-119
- Chen, J.M., Rich, P.M., Gower, S.T., Norman, J.M., & Plummer, S. (1997). Leaf area index of boreal forests: Theory, techniques, and measurements. *Journal of Geophysical Research: Atmospheres*, *102*, 29429-29443
- Farquhar, G.D., von Caemmerer, S., & Berry, J.A. (1980). A biochemical model of photosynthetic CO<sub>2</sub> assimilation in leaves of C<sub>3</sub> species. *Planta*, *149*, 78-90
- Leng, J., Chen, J.M., Li, W., Luo, X., Rogers, C., Croft, H., Xie, X., Staebler, R.M. (2023, under review). Optimizing seasonally variable photosynthetic parameters based on joint carbon and water flux constraints. submitted to *Agricultural and Forest Meteorology*
- Medlyn, B.E., Badeck, F.W., De Pury, D.G.G., Barton, C.V.M., Broadmeadow, M., Ceulemans, R., De Angelis, P., Forstreuter, M., Jach, M.E., Kellomäki, S., Laitat, E., Marek, M., Philippot, S., Rey, A., Strassemeier, J., Laitinen, K., Liozon, R., Portier, B., Roberntz, P., Wang, K., & Jstbid, P.G. (1999). Effects of elevated [CO<sub>2</sub>] on photosynthesis in European forest species: a meta-analysis of model parameters. *Plant, Cell & Environment*, *22*, 1475-1495
- Miner, G.L., Bauerle, W.L., & Baldocchi, D.D. (2017). Estimating the sensitivity of stomatal conductance to photosynthesis: a review. *Plant, Cell & Environment*, *40*, 1214-1238
- Norman, J.M. (1982). Simulation of Microclimates. In J.L. Hatfield, & I.J. Thomason (Eds.), *Biometeorology in Integrated Pest Management* (pp. 65-99): Academic Press
- Sharkey, T.D., Bernacchi, C.J., Farquhar, G.D., & Singsaas, E.L. (2007). Fitting photosynthetic carbon dioxide response curves for C<sub>3</sub> leaves. *Plant, Cell & Environment*, *30*, 1035-1040
- Smith, N.G., Keenan, T.F., Colin Prentice, I., Wang, H., Wright, I.J., Niinemets, U., Crous, K.Y., Domingues, T.F., Guerrieri, R., Yoko Ishida, F., Kattge, J., Kruger, E.L., Maire, V., Rogers, A., Serbin, S.P., Tarvainen, L., Togashi, H.F., Townsend, P.A., Wang, M., Weerasinghe, L.K., & Zhou, S.X. (2019). Global photosynthetic capacity is optimized to the environment. *Ecological Letter*, *22*, 506-517
- Wolz, K.J., Wertin, T.M., Abordo, M., Wang, D., & Leakey, A.D.B. (2017). Diversity in stomatal function is integral to modelling plant carbon and water fluxes. *Nature Ecology & Evolution*, *1*, 1292-1298
